# Supplementary material
Source: Springer Nature journal article supplement (https://www.springermedizin.de/resource/supplementary/13058_2013_3560_MOESM8_ESM.pdf/9704154)

**(a)**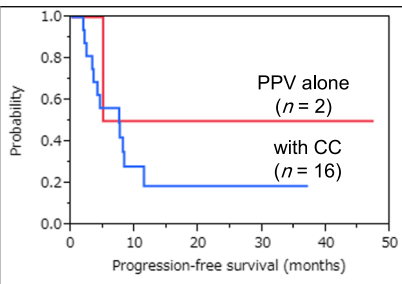

mrTNBC

**(c)**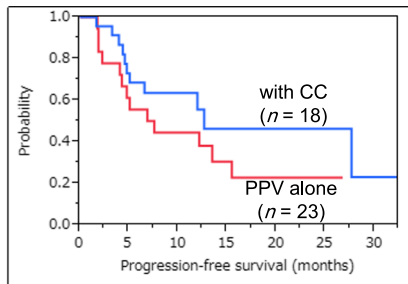

Lum-HER2(-)

**(e)**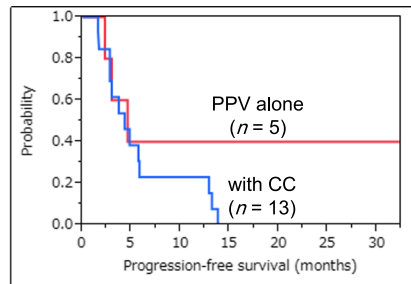

HER2(+)

**(b)**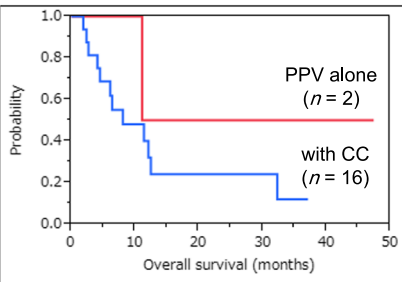**(d)**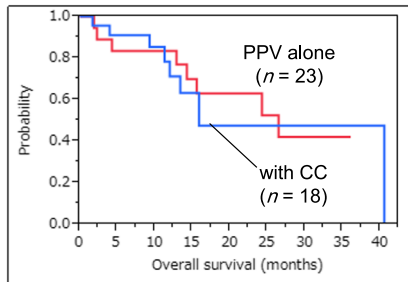**(f)**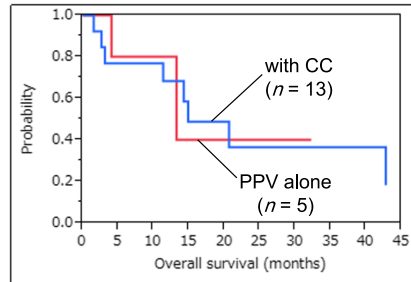

Supplement: MOESM8 [file 9704154]
